# Supplementary material for: Integrated Transcriptome Analysis and Single-Base Resolution Methylomes of Watermelon (Citrullus lanatus) Reveal Epigenome Modifications in Response to Osmotic Stress
Source: Front Plant Sci. 2021 Nov 29;12:769712. doi: 10.3389/fpls.2021.769712 (PMC8667863; doi:10.3389/fpls.2021.769712)
Supplement: Supplementary file 2 [file Table_1.xlsx]

## Sheet: Sheet1
gene_chr	Gene_id	C_context	region	diff.Methy	Met_change	log2FoldChange	padj	gene_biotype	tf_family	Rna_change	gene_description
Chr0	Cla001197	CHH	promoter	0.0619451	up	-2.68076	9.58e-09	protein_coding	-	down	-
Chr0	Cla001197	CG	promoter	-0.134284	down	-2.68076	9.58e-09	protein_coding	-	down	-
Chr0	Cla000128	CHH	exon	0.0639383	up	-1.62417	6.18e-09	protein_coding	-	down	-
Chr0	Cla000234	CHH	intron	-0.0866102	down	-2.25272	4.21e-06	protein_coding	p450	down	PF00067:Cytochrome P450
Chr1	Cla004976	CHH	promoter	-0.109866	down	-1.99337	7.41e-20	protein_coding	-	down	-
Chr1	Cla011368	CHH	promoter	-0.116347	down	-2.83544	4.6e-06	protein_coding	adh_short	down	PF00106:short chain dehydrogenase|PF13561:Enoyl-(Acyl carrier protein) reductase
Chr1	Cla011368	CHH	promoter	-0.0779728	down	-2.83544	4.6e-06	protein_coding	adh_short	down	PF00106:short chain dehydrogenase|PF13561:Enoyl-(Acyl carrier protein) reductase
Chr1	Cla011373	CHH	promoter	0.119565	up	0.942326	0.0122122	protein_coding	AMP-binding	up	PF00501:AMP-binding enzyme
Chr1	Cla011413	CHH	promoter	0.032115	up	-3.12218	4.37e-22	protein_coding	-	down	-
Chr1	Cla011413	CHH	TSS	0.032115	up	-3.12218	4.37e-22	protein_coding	-	down	-
Chr1	Cla011413	CHH	exon	0.032115	up	-3.12218	4.37e-22	protein_coding	-	down	-
Chr1	Cla011443	CHH	promoter	-0.0979897	down	0.572152	0.0128636	protein_coding	-	up	PF00579:tRNA synthetases class I (W and Y)
Chr1	Cla011477	CHH	promoter	0.0805753	up	-1.22073	0.000199121	protein_coding	-	down	PF16363:GDP-mannose 4,6 dehydratase
Chr1	Cla011533	CHH	promoter	0.0877818	up	-0.608968	0.0105835	protein_coding	-	down	PF00574:Clp protease
Chr1	Cla011545	CHH	promoter	0.0910649	up	1.65386	0.00736702	protein_coding	p450	up	PF00067:Cytochrome P450
Chr1	Cla011590	CHH	promoter	-0.0559727	down	2.35462	3.44e-08	protein_coding	PG_binding_1	up	PF01471:Putative peptidoglycan binding domain|PF00413:Matrixin
Chr1	Cla003597	CHH	promoter	0.116937	up	1.21183	0.000174902	protein_coding	-	up	PF13855:Leucine rich repeat
Chr1	Cla003624	CHH	promoter	0.030411	up	3.02689	0.00762635	protein_coding	Pkinase_Tyr	up	PF07714:Protein tyrosine kinase
Chr1	Cla003624	CHH	TSS	0.030411	up	3.02689	0.00762635	protein_coding	Pkinase_Tyr	up	PF07714:Protein tyrosine kinase
Chr1	Cla003624	CHH	exon	0.030411	up	3.02689	0.00762635	protein_coding	Pkinase_Tyr	up	PF07714:Protein tyrosine kinase
Chr1	Cla003911	CHH	promoter	-0.0532712	down	1.98226	4.43e-14	protein_coding	-	up	-
Chr1	Cla003916	CHH	promoter	0.0832734	up	-1.7542	0.000595868	protein_coding	-	down	PF02469:Fasciclin domain
Chr1	Cla003930	CHH	promoter	-0.0784514	down	1.21132	3.27e-10	protein_coding	-	up	-
Chr1	Cla003935	CHH	intron	-0.0640992	down	-0.831556	0.00250668	protein_coding	-	down	-
Chr1	Cla003941	CHH	exon	0.0270288	up	-1.02183	0.0169893	protein_coding	-	down	PF00759:Glycosyl hydrolase family 9
Chr1	Cla008478	CHH	promoter	-0.0505836	down	1.24902	1.1e-07	protein_coding	-	up	PF03151:Triose-phosphate Transporter family
Chr1	Cla008460	CHH	promoter	0.102332	up	2.13763	8.2e-11	protein_coding	DUF6	up	PF00892:EamA-like transporter family
Chr1	Cla008400	CHH	promoter	-0.0827288	down	0.48005	0.0366481	protein_coding	-	up	PF01201:Ribosomal protein S8e
Chr1	Cla008362	CHH	promoter	0.108318	up	-1.83091	9.55e-12	protein_coding	ABC2_membrane	down	PF00005:ABC transporter|PF01061:ABC-2 type transporter
Chr1	Cla008361	CHH	promoter	0.124671	up	-2.35835	0.000384373	protein_coding	2OG-FeII_Oxy	down	PF14226:non-haem dioxygenase in morphine synthesis N-terminal|PF03171:2OG-Fe(II) oxygenase superfamily
Chr1	Cla000982	CHH	promoter	-0.0405982	down	-1.66976	0.00470192	protein_coding	-	down	-
Chr1	Cla001857	CHH	promoter	-0.0768283	down	-0.896289	2.89e-05	protein_coding	-	down	PF00355:Rieske [2Fe-2S] domain|PF08417:Pheophorbide a oxygenase
Chr1	Cla001860	CHH	promoter	-0.107343	down	-0.678851	0.0150825	protein_coding	Histone	down	PF00125:Core histone H2A/H2B/H3/H4
Chr1	Cla003440	CHG	promoter	0.0579465	up	-1.05908	0.00213193	protein_coding	-	down	-
Chr1	Cla003440	CHG	TSS	0.0579465	up	-1.05908	0.00213193	protein_coding	-	down	-
Chr1	Cla003440	CHG	exon	0.0579465	up	-1.05908	0.00213193	protein_coding	-	down	-
Chr1	Cla003044	CHH	exon	-0.0296932	down	0.631274	0.038166	protein_coding	-	up	PF04520:Senescence regulator
Chr1	Cla001067	CHH	intron	0.0304569	up	-0.994867	0.00484887	protein_coding	-	down	PF14144:Seed dormancy control
Chr1	Cla011035	CHH	exon	-0.140141	down	1.76261	0.0113538	protein_coding	-	up	-
Chr1	Cla011035	CHH	TSS	-0.140141	down	1.76261	0.0113538	protein_coding	-	up	-
Chr1	Cla011035	CHH	promoter	-0.140141	down	1.76261	0.0113538	protein_coding	-	up	-
Chr1	Cla009052	CHH	promoter	-0.129433	down	-1.18607	1.1e-06	protein_coding	-	down	-
Chr1	Cla009089	CHH	intron	-0.0360773	down	1.48995	0.00242295	protein_coding	E1-E2_ATPase	up	PF00689:Cation transporting ATPase, C-terminus|PF00122:E1-E2 ATPase|PF00702:haloacid dehalogenase-like hydrolase|PF00690:Cation transporter/ATPase, N-terminus|PF12515:Ca2+-ATPase N terminal autoinhibitory domain
Chr1	Cla009091	CHH	TSS	0.0218629	up	-2.60765	2.15e-34	protein_coding	JmjC	down	PF10497:Zinc-finger domain of monoamine-oxidase A repressor R1|PF02373:JmjC domain, hydroxylase
Chr1	Cla009091	CHH	exon	0.0218629	up	-2.60765	2.15e-34	protein_coding	JmjC	down	PF10497:Zinc-finger domain of monoamine-oxidase A repressor R1|PF02373:JmjC domain, hydroxylase
Chr1	Cla009091	CHH	promoter	0.0218629	up	-2.60765	2.15e-34	protein_coding	JmjC	down	PF10497:Zinc-finger domain of monoamine-oxidase A repressor R1|PF02373:JmjC domain, hydroxylase
Chr1	Cla009181	CHH	exon	0.0217738	up	-1.80313	2.72e-06	protein_coding	-	down	PF02507:Photosystem I reaction centre subunit III
Chr1	Cla000718	CHH	promoter	0.117232	up	0.780909	0.00877262	protein_coding	-	up	PF10607:CTLH/CRA C-terminal to LisH motif domain
Chr1	Cla013977	CHH	promoter	-0.0425787	down	-1.19287	0.00061025	protein_coding	CH	down	PF00307:Calponin homology (CH) domain|PF03271:EB1-like C-terminal motif
Chr1	Cla014000	CHH	promoter	-0.0386428	down	-0.988671	0.00386968	protein_coding	-	down	PF12697:Alpha/beta hydrolase family
Chr1	Cla014021	CHH	promoter	0.0526735	up	1.79837	5.21e-06	protein_coding	-	up	-
Chr1	Cla014029	CHH	intron	-0.0551193	down	1.25248	0.00225129	protein_coding	Myb_DNA-binding	up	PF00249:Myb-like DNA-binding domain
Chr1	Cla014076	CHH	promoter	0.0362314	up	-0.552133	0.028407	protein_coding	Kinesin	down	PF00225:Kinesin motor domain
Chr1	Cla014100	CHH	promoter	-0.0791732	down	1.15757	1.04e-05	protein_coding	-	up	-
Chr1	Cla014170	CHH	promoter	-0.0697328	down	-1.15471	1.19e-06	protein_coding	adh_short	down	PF00106:short chain dehydrogenase
Chr1	Cla014234	CHH	promoter	-0.0833856	down	1.75048	0.00756477	protein_coding	HMA	up	PF00403:Heavy-metal-associated domain
Chr1	Cla014315	CHH	promoter	0.0668248	up	1.03658	0.0328918	protein_coding	-	up	PF14541:Xylanase inhibitor C-terminal|PF14543:Xylanase inhibitor N-terminal
Chr1	Cla014320	CHH	exon	0.0586508	up	-1.37046	1.68e-05	protein_coding	Pkinase	down	PF00069:Protein kinase domain
Chr1	Cla014320	CHH	TSS	0.0586508	up	-1.37046	1.68e-05	protein_coding	Pkinase	down	PF00069:Protein kinase domain
Chr1	Cla014320	CHH	promoter	0.0586508	up	-1.37046	1.68e-05	protein_coding	Pkinase	down	PF00069:Protein kinase domain
Chr1	Cla014460	CHH	promoter	0.072371	up	0.615345	0.0192831	protein_coding	CDP-OH_P_transf	up	PF01066:CDP-alcohol phosphatidyltransferase
Chr1	Cla009639	CHH	promoter	0.0516904	up	2.36275	1.45e-21	protein_coding	-	up	-
Chr1	Cla009674	CHH	promoter	0.0211816	up	-1.18825	1.58e-07	protein_coding	-	down	PF13472:GDSL-like Lipase/Acylhydrolase family
Chr1	Cla009675	CHH	promoter	0.0211816	up	-1.51371	1.12e-12	protein_coding	TPP_enzyme_N	down	PF02775:Thiamine pyrophosphate enzyme, C-terminal TPP binding domain|PF00205:Thiamine pyrophosphate enzyme, central domain|PF02776:Thiamine pyrophosphate enzyme, N-terminal TPP binding domain
Chr1	Cla009727	CHH	exon	0.0212068	up	-1.93593	5.71e-05	protein_coding	Peptidase_S8	down	PF00082:Subtilase family|PF02225:PA domain|PF05922:Peptidase inhibitor I9
Chr1	Cla009727	CHH	intron	0.0212068	up	-1.93593	5.71e-05	protein_coding	Peptidase_S8	down	PF00082:Subtilase family|PF02225:PA domain|PF05922:Peptidase inhibitor I9
Chr10	Cla008942	CHH	intron	0.107949	up	-1.43461	4.6e-11	protein_coding	-	down	-
Chr10	Cla005684	CHH	promoter	0.0481984	up	1.27603	2.05e-06	protein_coding	Epimerase	up	PF01370:NAD dependent epimerase/dehydratase family
Chr10	Cla004493	CHH	intron	0.0282427	up	1.8455	1.92e-11	protein_coding	Pkinase	up	PF00069:Protein kinase domain
Chr10	Cla004449	CHH	promoter	0.0997696	up	-0.648297	0.0332785	protein_coding	Na_Ca_ex	down	PF01699:Sodium/calcium exchanger protein
Chr10	Cla004837	CHH	promoter	0.118186	up	-0.843975	0.00750527	protein_coding	-	down	PF00831:Ribosomal L29 protein
Chr10	Cla004841	CHH	promoter	0.128264	up	-1.02906	0.00903004	protein_coding	-	down	PF00191:Annexin
Chr10	Cla004841	CHH	intron	-0.142956	down	-1.02906	0.00903004	protein_coding	-	down	PF00191:Annexin
Chr10	Cla001112	CHH	intron	0.0212445	up	0.539228	0.0297065	protein_coding	Pkinase	up	PF00069:Protein kinase domain|PF08263:Leucine rich repeat N-terminal domain
Chr10	Cla001112	CHH	exon	0.0212445	up	0.539228	0.0297065	protein_coding	Pkinase	up	PF00069:Protein kinase domain|PF08263:Leucine rich repeat N-terminal domain
Chr10	Cla002470	CHH	promoter	-0.0866004	down	0.526718	0.0313481	protein_coding	AOX	up	PF01786:Alternative oxidase
Chr10	Cla002481	CHH	promoter	0.0977985	up	-2.29561	0.0325821	protein_coding	Ribonuclease_T2	down	PF00445:Ribonuclease T2 family
Chr10	Cla006439	CHH	TES	-0.0697671	down	-2.07118	0.00513913	protein_coding	-	down	PF00331:Glycosyl hydrolase family 10
Chr10	Cla006439	CHH	exon	-0.0697671	down	-2.07118	0.00513913	protein_coding	-	down	PF00331:Glycosyl hydrolase family 10
Chr10	Cla006429	CHH	promoter	-0.0884923	down	2.02758	6.55e-07	protein_coding	-	up	-
Chr10	Cla006429	CHH	promoter	0.0561249	up	2.02758	6.55e-07	protein_coding	-	up	-
Chr10	Cla001317	CHH	promoter	0.12656	up	-0.660025	0.0223264	protein_coding	-	down	PF11998:Protein of unknown function (DUF3493)
Chr10	Cla017339	CHH	promoter	-0.0685648	down	-0.959323	0.0165695	protein_coding	-	down	-
Chr10	Cla017296	CHH	exon	0.0232176	up	1.96925	3.64e-09	protein_coding	-	up	PF13813:Membrane bound O-acyl transferase family
Chr10	Cla017281	CHH	promoter	0.18657	up	-1.64797	3.22e-09	protein_coding	-	down	PF08498:Sterol methyltransferase C-terminal|PF02353:Mycolic acid cyclopropane synthetase
Chr10	Cla017238	CHH	promoter	-0.0482179	down	1.19369	0.00627486	protein_coding	-	up	PF15306:LIN37
Chr10	Cla017238	CHH	TSS	-0.0482179	down	1.19369	0.00627486	protein_coding	-	up	PF15306:LIN37
Chr10	Cla017238	CHH	exon	-0.0482179	down	1.19369	0.00627486	protein_coding	-	up	PF15306:LIN37
Chr10	Cla017227	CHH	promoter	-0.0371535	down	-0.880297	0.00136993	protein_coding	-	down	-
Chr10	Cla017223	CHH	promoter	0.0789734	up	-0.825788	0.00332757	protein_coding	-	down	-
Chr10	Cla017169	CHH	intron	0.0248223	up	-0.700875	0.0231202	protein_coding	-	down	PF01583:Adenylylsulphate kinase
Chr10	Cla017162	CHH	promoter	0.128281	up	1.22635	0.000178934	protein_coding	-	up	PF03016:Exostosin family
Chr10	Cla017153	CHH	promoter	-0.136449	down	2.65974	0.000228517	protein_coding	-	up	-
Chr10	Cla017153	CHH	exon	0.0429057	up	2.65974	0.000228517	protein_coding	-	up	-
Chr10	Cla017147	CHH	promoter	-0.0719368	down	-1.28796	0.000256776	protein_coding	F-box	down	PF00646:F-box domain
Chr10	Cla017144	CHH	promoter	-0.0465758	down	-1.76616	3.7e-07	protein_coding	-	down	-
Chr10	Cla017119	CHH	promoter	0.114887	up	-0.882745	0.00197434	protein_coding	Pkinase	down	PF00069:Protein kinase domain
Chr10	Cla017113	CHH	promoter	-0.106233	down	0.893532	0.0475652	protein_coding	-	up	PF05691:Raffinose synthase or seed imbibition protein Sip1
Chr10	Cla017112	CHH	promoter	-0.124375	down	2.51047	5.66e-05	protein_coding	Pkinase	up	PF01657:Salt stress response/antifungal|PF00069:Protein kinase domain
Chr10	Cla017086	CHH	promoter	0.0763373	up	-0.801655	0.0127872	protein_coding	Pro_isomerase	down	PF00160:Cyclophilin type peptidyl-prolyl cis-trans isomerase/CLD
Chr10	Cla017019	CHH	promoter	-0.0481827	down	-1.44603	1.09e-05	protein_coding	Aldose_epim	down	PF01263:Aldose 1-epimerase
Chr10	Cla002929	CHH	promoter	0.118819	up	-0.838923	0.0278048	protein_coding	-	down	PF03151:Triose-phosphate Transporter family
Chr10	Cla002915	CHH	intron	-0.0483682	down	-0.601297	0.0460306	protein_coding	RNase_PH	down	PF01138:3' exoribonuclease family, domain 1|PF00575:S1 RNA binding domain|PF03725:3' exoribonuclease family, domain 2
Chr10	Cla002895	CHH	promoter	0.134651	up	-1.32036	3.31e-08	protein_coding	-	down	PF00462:Glutaredoxin
Chr10	Cla002891	CHH	promoter	-0.1148	down	1.33099	5.32e-08	protein_coding	Response_reg	up	PF00072:Response regulator receiver domain
Chr10	Cla017464	CHH	promoter	-0.0771499	down	-0.683951	0.00634708	protein_coding	-	down	PF01412:Putative GTPase activating protein for Arf
Chr10	Cla017500	CHH	promoter	0.0825726	up	0.620773	0.0176238	protein_coding	-	up	PF09764:N-terminal glutamine amidase
Chr10	Cla017543	CHH	promoter	-0.0821222	down	-0.843121	0.0147674	protein_coding	-	down	-
Chr10	Cla017543	CHH	intron	-0.114125	down	-0.843121	0.0147674	protein_coding	-	down	-
Chr10	Cla017624	CHH	promoter	0.0282338	up	1.34169	1.58e-09	protein_coding	POX	up	PF07526:Associated with HOX|PF05920:Homeobox KN domain
Chr10	Cla017665	CHH	promoter	-0.0618175	down	-0.817958	0.00301394	protein_coding	-	down	-
Chr10	Cla017676	CHH	promoter	0.0483892	up	-1.07273	0.000136098	protein_coding	Kinesin	down	PF00225:Kinesin motor domain
Chr10	Cla017705	CHH	intron	0.0508959	up	1.18121	1.23e-05	protein_coding	Lipase_GDSL	up	PF00657:GDSL-like Lipase/Acylhydrolase
Chr10	Cla017715	CHH	promoter	0.118344	up	-0.762028	0.00139571	protein_coding	-	down	PF02922:Carbohydrate-binding module 48 (Isoamylase N-terminal domain)|PF00128:Alpha amylase, catalytic domain|PF02806:Alpha amylase, C-terminal all-beta domain
Chr10	Cla017729	CHH	promoter	-0.127234	down	-0.615953	0.0398388	protein_coding	HSF_DNA-bind	down	PF00447:HSF-type DNA-binding
Chr10	Cla017768	CHH	promoter	0.111317	up	1.7517	0.000493919	protein_coding	UDPGT	up	PF00201:UDP-glucoronosyl and UDP-glucosyl transferase
Chr10	Cla017865	CHH	promoter	-0.0963321	down	0.734667	0.004814	protein_coding	-	up	PF08235:LNS2 (Lipin/Ned1/Smp2)|PF16876:Lipin/Ned1/Smp2 multi-domain protein middle domain|PF04571:lipin, N-terminal conserved region
Chr10	Cla017993	CHH	promoter	-0.0639501	down	5.56842	0.00597287	protein_coding	2OG-FeII_Oxy	up	PF14226:non-haem dioxygenase in morphine synthesis N-terminal|PF03171:2OG-Fe(II) oxygenase superfamily
Chr11	Cla006597	CHH	promoter	-0.0322336	down	1.6019	3.62e-08	protein_coding	-	up	PF14416:PMR5 N terminal Domain|PF13839:GDSL/SGNH-like Acyl-Esterase family found in Pmr5 and Cas1p
Chr11	Cla011873	CHH	promoter	0.0741421	up	-1.78079	5.59e-05	protein_coding	-	down	-
Chr11	Cla011873	CHH	promoter	-0.121483	down	-1.78079	5.59e-05	protein_coding	-	down	-
Chr11	Cla011904	CHH	exon	0.0353297	up	-2.07707	4.41e-09	protein_coding	-	down	-
Chr11	Cla011904	CHH	TSS	0.0353297	up	-2.07707	4.41e-09	protein_coding	-	down	-
Chr11	Cla011904	CHH	promoter	0.0353297	up	-2.07707	4.41e-09	protein_coding	-	down	-
Chr11	Cla011936	CHH	promoter	-0.0487838	down	1.29258	2.46e-07	protein_coding	LRRNT_2	up	PF13855:Leucine rich repeat|PF08263:Leucine rich repeat N-terminal domain
Chr11	Cla004150	CHH	intron	0.0262519	up	-0.639445	0.0381028	protein_coding	Glyco_hydro_1	down	PF00232:Glycosyl hydrolase family 1
Chr11	Cla003358	CHH	intron	-0.0567303	down	-1.20298	1.35e-05	protein_coding	-	down	PF05460:Origin recognition complex subunit 6 (ORC6)
Chr11	Cla007943	CHH	promoter	0.0922811	up	-1.26761	0.00264635	protein_coding	-	down	-
Chr11	Cla007867	CHH	promoter	0.0647083	up	-2.09134	0.00252999	protein_coding	HLH	down	PF14215:bHLH-MYC and R2R3-MYB transcription factors N-terminal|PF00010:Helix-loop-helix DNA-binding domain
Chr11	Cla005753	CHH	intron	-0.131731	down	1.32121	0.00268255	protein_coding	-	up	PF00759:Glycosyl hydrolase family 9
Chr11	Cla005753	CHH	intron	-0.162218	down	1.32121	0.00268255	protein_coding	-	up	PF00759:Glycosyl hydrolase family 9
Chr11	Cla022835	CHH	promoter	0.0370709	up	1.48745	0.000186718	protein_coding	-	up	PF00732:GMC oxidoreductase|PF05199:GMC oxidoreductase
Chr11	Cla022939	CHH	exon	0.0367912	up	-2.05965	8.16e-09	protein_coding	TCP	down	PF03634:TCP family transcription factor
Chr11	Cla022959	CHH	promoter	0.0379648	up	1.14067	0.000602877	protein_coding	-	up	PF04669:Polysaccharide biosynthesis
Chr11	Cla022962	CHH	exon	0.0364694	up	2.18853	9.78e-11	protein_coding	-	up	-
Chr11	Cla022984	CHH	promoter	-0.104398	down	1.06471	0.00266114	protein_coding	AAA	up	PF14363:Domain associated at C-terminal with AAA|PF00004:ATPase family associated with various cellular activities (AAA)
Chr11	Cla022990	CHH	promoter	0.0538026	up	-0.808065	0.0218429	protein_coding	Helicase_C	down	PF00270:DEAD/DEAH box helicase|PF00271:Helicase conserved C-terminal domain
Chr11	Cla023020	CHH	promoter	-0.0677817	down	-1.9005	5.55e-11	protein_coding	-	down	PF04674:Phosphate-induced protein 1 conserved region
Chr11	Cla023180	CHH	promoter	0.115802	up	1.33906	1.51e-09	protein_coding	-	up	PF14543:Xylanase inhibitor N-terminal|PF14541:Xylanase inhibitor C-terminal
Chr11	Cla023186	CHH	promoter	0.101882	up	-0.935744	0.0272936	protein_coding	-	down	PF13041:PPR repeat family
Chr11	Cla023324	CHH	promoter	-0.107723	down	-0.725787	0.00190703	protein_coding	-	down	PF09507:DNA polymerase subunit Cdc27
Chr11	Cla023335	CHH	promoter	0.0589379	up	0.744443	0.0184003	protein_coding	B_lectin	up	PF01453:D-mannose binding lectin
Chr11	Cla023366	CHH	intron	-0.0661476	down	-2.89199	2.7e-14	protein_coding	-	down	PF06325:Ribosomal protein L11 methyltransferase (PrmA)
Chr11	Cla023457	CHH	promoter	-0.104384	down	-0.857939	0.0316142	protein_coding	-	down	PF06733:DEAD_2|PF13307:Helicase C-terminal domain
Chr11	Cla016546	CHH	promoter	0.0603592	up	2.19508	6.67e-30	protein_coding	Sugar_tr	up	PF00083:Sugar (and other) transporter
Chr11	Cla016705	CHH	promoter	-0.084855	down	-0.719215	0.0136482	protein_coding	SPX	down	PF03105:SPX domain
Chr11	Cla016718	CHH	promoter	-0.0992983	down	0.980528	0.000376828	protein_coding	-	up	PF03151:Triose-phosphate Transporter family
Chr11	Cla016830	CHH	promoter	0.101494	up	-1.55647	0.0346097	protein_coding	-	down	-
Chr11	Cla016921	CHH	promoter	-0.148959	down	0.657954	0.00749425	protein_coding	GTP_EFTU	up	PF03144:Elongation factor Tu domain 2|PF09173:Initiation factor eIF2 gamma, C terminal|PF00009:Elongation factor Tu GTP binding domain
Chr11	Cla016937	CHH	promoter	0.068778	up	3.15996	1.14e-07	protein_coding	-	up	PF00141:Peroxidase
Chr11	Cla001898	CHH	intron	0.0429453	up	-1.25099	4.63e-06	protein_coding	-	down	-
Chr11	Cla001891	CHH	intron	-0.144308	down	0.652565	0.0230676	protein_coding	adh_short	up	PF06732:Pescadillo N-terminus|PF00106:short chain dehydrogenase
Chr11	Cla001871	CHH	promoter	-0.0511198	down	0.899128	0.0462022	protein_coding	-	up	-
Chr2	Cla007669	CHH	intron	-0.0861522	down	1.15088	0.0127783	protein_coding	MatE	up	PF01554:MatE
Chr2	Cla007690	CHH	promoter	0.0448229	up	-1.10062	0.031157	protein_coding	-	down	PF01657:Salt stress response/antifungal
Chr2	Cla007725	CHH	promoter	-0.0736173	down	-3.29227	1.72e-21	protein_coding	-	down	-
Chr2	Cla007803	CHH	promoter	-0.104637	down	-0.602821	0.0268174	protein_coding	-	down	PF01095:Pectinesterase|PF04043:Plant invertase/pectin methylesterase inhibitor
Chr2	Cla007804	CHH	promoter	-0.104637	down	-1.17959	0.00230757	protein_coding	-	down	PF14416:PMR5 N terminal Domain|PF13839:GDSL/SGNH-like Acyl-Esterase family found in Pmr5 and Cas1p
Chr2	Cla015629	CHH	promoter	-0.135545	down	0.7163	0.0010544	protein_coding	GTP_EFTU	up	PF00679:Elongation factor G C-terminus|PF00009:Elongation factor Tu GTP binding domain
Chr2	Cla015688	CHH	promoter	0.100752	up	0.816236	0.00193542	protein_coding	LRRNT_2	up	PF13855:Leucine rich repeat|PF08263:Leucine rich repeat N-terminal domain
Chr2	Cla015698	CHH	intron	0.0977194	up	-1.7685	3.67e-05	protein_coding	-	down	PF16719:SAWADEE domain
Chr2	Cla015707	CHH	intron	-0.0360509	down	-0.875959	0.000210907	protein_coding	-	down	-
Chr2	Cla015774	CHH	promoter	0.139364	up	-1.55483	3.74e-06	protein_coding	-	down	PF03330:Lytic transglycolase|PF01357:Pollen allergen
Chr2	Cla015923	CHH	promoter	0.0803357	up	-0.792811	0.0360882	protein_coding	-	down	PF02536:mTERF
Chr2	Cla015973	CHH	promoter	0.124008	up	-2.86655	8.27e-14	protein_coding	-	down	-
Chr2	Cla016032	CHH	promoter	-0.0904339	down	2.07245	1.45e-22	protein_coding	UDPGT	up	PF00201:UDP-glucoronosyl and UDP-glucosyl transferase
Chr2	Cla016042	CHH	intron	0.0920489	up	-1.44377	0.0100754	protein_coding	-	down	PF04199:Putative cyclase
Chr2	Cla010437	CHH	promoter	0.10483	up	0.841336	6.4e-05	protein_coding	-	up	PF00327:Ribosomal protein L30p/L7e
Chr2	Cla010464	CHH	exon	0.0313179	up	-2.7339	3.12e-09	protein_coding	-	down	PF04674:Phosphate-induced protein 1 conserved region
Chr2	Cla010464	CHH	TSS	0.0313179	up	-2.7339	3.12e-09	protein_coding	-	down	PF04674:Phosphate-induced protein 1 conserved region
Chr2	Cla010464	CHH	promoter	0.0313179	up	-2.7339	3.12e-09	protein_coding	-	down	PF04674:Phosphate-induced protein 1 conserved region
Chr2	Cla010491	CHH	promoter	-0.0667212	down	-2.14619	0.0157468	protein_coding	-	down	-
Chr2	Cla001585	CHH	promoter	0.0791345	up	1.69929	0.000391457	protein_coding	Ras	up	PF00071:Ras family
Chr2	Cla020309	CHH	promoter	-0.0851331	down	1.09904	2.53e-06	protein_coding	-	up	PF06273:Plant specific eukaryotic initiation factor 4B
Chr2	Cla020254	CHH	promoter	-0.12081	down	-1.59744	1.4e-15	protein_coding	-	down	PF00749:tRNA synthetases class I (E and Q), catalytic domain|PF04557:Glutaminyl-tRNA synthetase, non-specific RNA binding region part 2|PF04558:Glutaminyl-tRNA synthetase, non-specific RNA binding region part 1|PF03950:tRNA synthetases class I (E and Q), anti-codon binding domain
Chr2	Cla020240	CHH	promoter	-0.0644664	down	0.739512	0.0297849	protein_coding	-	up	-
Chr2	Cla020209	CHH	promoter	-0.0868504	down	-1.00628	0.0125857	protein_coding	-	down	PF07939:Protein of unknown function (DUF1685)
Chr2	Cla020164	CHH	exon	0.025472	up	1.24677	0.000119857	protein_coding	-	up	-
Chr2	Cla020138	CHH	promoter	-0.116459	down	-0.783032	0.0213886	protein_coding	Pkinase	down	PF00069:Protein kinase domain
Chr2	Cla020098	CHH	promoter	-0.0200969	down	-1.27565	1.39e-05	protein_coding	Pkinase_Tyr	down	PF07714:Protein tyrosine kinase|PF12819:Carbohydrate-binding protein of the ER
Chr2	Cla020024	CHH	exon	0.0226732	up	0.551878	0.0359292	protein_coding	RRM_1	up	PF00076:RNA recognition motif. (a.k.a. RRM, RBD, or RNP domain)
Chr2	Cla019959	CHH	exon	0.0900669	up	-3.83058	5.8e-48	protein_coding	Usp	down	PF00582:Universal stress protein family
Chr2	Cla019959	CHH	intron	0.0900669	up	-3.83058	5.8e-48	protein_coding	Usp	down	PF00582:Universal stress protein family
Chr2	Cla013461	CHH	promoter	0.121995	up	3.92116	0.000181573	protein_coding	Myb_DNA-binding	up	PF00249:Myb-like DNA-binding domain
Chr2	Cla013423	CHH	promoter	-0.0796122	down	-0.770039	0.000480345	protein_coding	UQ_con	down	PF00179:Ubiquitin-conjugating enzyme
Chr2	Cla013396	CHH	intron	-0.0583354	down	-0.82532	0.0117028	protein_coding	Lipase_GDSL	down	PF00657:GDSL-like Lipase/Acylhydrolase
Chr2	Cla013284	CHH	promoter	-0.10225	down	-0.981819	2.48e-05	protein_coding	Ras	down	PF00071:Ras family
Chr2	Cla013265	CHH	promoter	0.102299	up	-1.46042	1.15e-05	protein_coding	-	down	-
Chr2	Cla008736	CHH	intron	0.0209279	up	0.666471	0.00917321	protein_coding	Auxin_resp	up	PF02362:B3 DNA binding domain|PF06507:Auxin response factor
Chr2	Cla008736	CHH	exon	0.0209279	up	0.666471	0.00917321	protein_coding	Auxin_resp	up	PF02362:B3 DNA binding domain|PF06507:Auxin response factor
Chr2	Cla008721	CG	promoter	0.047382	up	-6.15114	5.94e-05	protein_coding	TCP	down	PF03634:TCP family transcription factor
Chr2	Cla008665	CHH	intron	0.0860157	up	-0.932336	0.0275509	protein_coding	ABC2_membrane	down	PF14510:ABC-transporter extracellular N-terminal|PF00005:ABC transporter|PF01061:ABC-2 type transporter|PF08370:Plant PDR ABC transporter associated
Chr2	Cla008644	CHH	promoter	0.0791578	up	-1.10338	1.73e-05	protein_coding	zf-A20	down	PF01754:A20-like zinc finger|PF01428:AN1-like Zinc finger
Chr2	Cla008639	CHH	promoter	-0.0456909	down	3.813	3.11e-10	protein_coding	-	up	PF03168:Late embryogenesis abundant protein
Chr2	Cla003166	CHH	promoter	-0.111067	down	-0.445627	0.0401598	protein_coding	Arm	down	PF00514:Armadillo/beta-catenin-like repeat
Chr2	Cla003153	CHH	promoter	-0.042854	down	-2.48759	6.53e-05	protein_coding	UDPGT	down	PF00201:UDP-glucoronosyl and UDP-glucosyl transferase
Chr2	Cla003131	CHH	promoter	-0.119291	down	0.498864	0.0326409	protein_coding	HEAT	up	PF02985:HEAT repeat|PF13646:HEAT repeats
Chr3	Cla008152	CHH	promoter	0.0571838	up	-1.56129	4.22e-06	protein_coding	Pkinase	down	PF00069:Protein kinase domain
Chr3	Cla008169	CHH	promoter	-0.0419772	down	-0.944577	0.000478955	protein_coding	-	down	PF13920:Zinc finger, C3HC4 type (RING finger)
Chr3	Cla008181	CHH	intron	-0.108928	down	-0.771178	0.0122351	protein_coding	Glyco_hydro_3	down	PF00933:Glycosyl hydrolase family 3 N terminal domain|PF01915:Glycosyl hydrolase family 3 C-terminal domain
Chr3	Cla008246	CHH	promoter	-0.0652685	down	-0.759459	0.00898043	protein_coding	-	down	PF02469:Fasciclin domain
Chr3	Cla008296	CHH	promoter	-0.0701779	down	-0.787198	0.0404745	protein_coding	-	down	-
Chr3	Cla005044	CHH	intron	0.0743397	up	1.27936	0.00954605	protein_coding	-	up	PF03094:Mlo family
Chr3	Cla005044	CHH	intron	-0.0479721	down	1.27936	0.00954605	protein_coding	-	up	PF03094:Mlo family
Chr3	Cla019388	CHH	intron	0.0211628	up	0.632086	0.0284411	protein_coding	-	up	PF01458:Uncharacterized protein family (UPF0051)
Chr3	Cla019390	CHH	promoter	-0.17533	down	2.34972	2.23e-09	protein_coding	-	up	PF00011:Hsp20/alpha crystallin family
Chr3	Cla019403	CHH	promoter	-0.107795	down	-2.18186	5.62e-20	protein_coding	-	down	PF00722:Glycosyl hydrolases family 16|PF06955:Xyloglucan endo-transglycosylase (XET) C-terminus
Chr3	Cla019438	CHH	promoter	-0.0704278	down	-1.10335	0.0152674	protein_coding	B_lectin	down	PF01453:D-mannose binding lectin|PF00954:S-locus glycoprotein domain|PF08276:PAN-like domain|PF11883:Domain of unknown function (DUF3403)|PF07714:Protein tyrosine kinase
Chr3	Cla019443	CHH	promoter	0.0926196	up	0.98905	0.0126141	protein_coding	B_lectin	up	PF08276:PAN-like domain|PF11883:Domain of unknown function (DUF3403)|PF01453:D-mannose binding lectin|PF07714:Protein tyrosine kinase|PF00954:S-locus glycoprotein domain
Chr3	Cla019444	CHH	promoter	-0.0639308	down	0.874868	0.00953255	protein_coding	Pkinase_Tyr	up	PF01453:D-mannose binding lectin|PF07714:Protein tyrosine kinase|PF08276:PAN-like domain|PF00954:S-locus glycoprotein domain
Chr3	Cla019508	CHH	promoter	-0.0755172	down	1.51337	0.00112449	protein_coding	Pkinase	up	PF00069:Protein kinase domain|PF00139:Legume lectin domain
Chr3	Cla019509	CHH	promoter	0.081617	up	-3.23865	1.16e-32	protein_coding	-	down	PF04720:PDDEXK-like family of unknown function
Chr3	Cla019513	CHG	exon	0.0653525	up	0.759925	0.000335555	protein_coding	-	up	PF01399:PCI domain
Chr3	Cla019514	CHG	exon	0.0633748	up	0.644304	0.00808848	protein_coding	-	up	PF01399:PCI domain
Chr3	Cla019526	CHH	intron	-0.106334	down	-2.01217	4.34e-11	protein_coding	-	down	PF13520:Amino acid permease|PF13906:C-terminus of AA_permease
Chr3	Cla019566	CHH	exon	-0.0255671	down	1.51914	0.000298423	protein_coding	Sugar_tr	up	PF00083:Sugar (and other) transporter
Chr3	Cla019633	CHH	promoter	-0.0820841	down	-1.58944	7.38e-07	protein_coding	-	down	PF06884:Protein of unknown function (DUF1264)
Chr3	Cla019701	CHH	promoter	0.0327316	up	1.18544	0.0024588	protein_coding	AP2	up	PF00847:AP2 domain
Chr3	Cla019754	CHH	promoter	-0.109789	down	-0.56606	0.0200609	protein_coding	adh_short	down	PF00106:short chain dehydrogenase
Chr3	Cla003512	CHH	intron	0.105015	up	2.3764	7.91e-05	protein_coding	-	up	PF06351:Allene oxide cyclase
Chr3	Cla002178	CHH	promoter	-0.0335979	down	-0.569851	0.0391825	protein_coding	-	down	PF00085:Thioredoxin
Chr3	Cla002178	CHH	TSS	-0.0335979	down	-0.569851	0.0391825	protein_coding	-	down	PF00085:Thioredoxin
Chr3	Cla002178	CHH	exon	-0.0335979	down	-0.569851	0.0391825	protein_coding	-	down	PF00085:Thioredoxin
Chr3	Cla007324	CHH	promoter	-0.0931681	down	-0.553865	0.0178529	protein_coding	U-box	down	PF04564:U-box domain
Chr3	Cla007374	CHH	promoter	-0.0618493	down	-1.31238	5.5e-09	protein_coding	-	down	PF14852:Fis1 N-terminal tetratricopeptide repeat|PF14853:Fis1 C-terminal tetratricopeptide repeat
Chr3	Cla001771	CHH	promoter	-0.0405015	down	0.793418	0.0132732	protein_coding	Metallophos	up	PF00149:Calcineurin-like phosphoesterase|PF16891:Serine-threonine protein phosphatase N-terminal domain
Chr3	Cla004792	CHH	promoter	-0.0751853	down	-1.06305	0.00344429	protein_coding	-	down	PF13561:Enoyl-(Acyl carrier protein) reductase
Chr3	Cla004755	CHH	intron	-0.109238	down	1.67358	1.47e-06	protein_coding	-	up	PF07731:Multicopper oxidase|PF00394:Multicopper oxidase|PF07732:Multicopper oxidase
Chr3	Cla011098	CHH	promoter	0.126782	up	-0.819765	0.004902	protein_coding	-	down	PF00355:Rieske [2Fe-2S] domain|PF08417:Pheophorbide a oxygenase
Chr3	Cla011172	CHH	promoter	0.127012	up	-1.07519	1.12e-05	protein_coding	p450	down	PF00067:Cytochrome P450
Chr3	Cla011222	CHH	promoter	-0.118251	down	3.03829	1.42e-14	protein_coding	-	up	-
Chr3	Cla011241	CHH	promoter	-0.0563413	down	-0.872682	0.00136584	protein_coding	ESCRT-III	down	PF03357:Snf7
Chr3	Cla011268	CHH	promoter	-0.103767	down	1.85932	2.52e-17	protein_coding	Malic_M	up	PF03949:Malic enzyme, NAD binding domain|PF00390:Malic enzyme, N-terminal domain
Chr3	Cla011312	CHH	intron	0.121026	up	0.895814	0.0129911	protein_coding	-	up	PF01156:Inosine-uridine preferring nucleoside hydrolase
Chr3	Cla005225	CHH	exon	0.0267192	up	-2.10983	1.28e-05	protein_coding	FH2	down	PF02181:Formin Homology 2 Domain
Chr3	Cla005168	CHH	intron	-0.112291	down	4.6061	1.25e-96	protein_coding	-	up	PF07887:Calmodulin binding protein-like
Chr3	Cla005143	CHG	exon	0.0653225	up	1.97544	0.000168505	protein_coding	-	up	-
Chr3	Cla005136	CHH	promoter	-0.143746	down	-1.97912	0.000639256	protein_coding	-	down	PF00190:Cupin
Chr4	Cla000743	CHH	promoter	0.0673274	up	-1.36245	5.58e-07	protein_coding	-	down	-
Chr4	Cla011652	CHH	exon	-0.0289197	down	0.499803	0.0487887	protein_coding	-	up	-
Chr4	Cla001651	CHH	promoter	-0.0808677	down	-0.831167	0.000128968	protein_coding	Response_reg	down	PF00072:Response regulator receiver domain
Chr4	Cla012131	CHH	promoter	0.095737	up	-1.79756	3.39e-13	protein_coding	-	down	PF02812:Glu/Leu/Phe/Val dehydrogenase, dimerisation domain|PF00208:Glutamate/Leucine/Phenylalanine/Valine dehydrogenase
Chr4	Cla018075	CHH	promoter	0.100314	up	-0.837685	0.00383491	protein_coding	-	down	PF10604:Polyketide cyclase / dehydrase and lipid transport
Chr4	Cla018088	CHH	intron	-0.07521	down	-5.94061	4.22e-06	protein_coding	TPP_enzyme_N	down	PF02776:Thiamine pyrophosphate enzyme, N-terminal TPP binding domain|PF02775:Thiamine pyrophosphate enzyme, C-terminal TPP binding domain|PF00205:Thiamine pyrophosphate enzyme, central domain
Chr4	Cla018206	CHH	promoter	-0.0908944	down	1.08292	4.24e-06	protein_coding	Pkinase	up	PF00069:Protein kinase domain
Chr4	Cla018260	CHH	promoter	0.0764956	up	-1.14452	0.000262001	protein_coding	-	down	PF03741:Integral membrane protein TerC family
Chr4	Cla018357	CHH	intron	-0.122724	down	-2.08671	5.12e-27	protein_coding	-	down	PF01925:Sulfite exporter TauE/SafE
Chr4	Cla018382	CHH	promoter	-0.0577849	down	1.41654	0.00236403	protein_coding	Peptidase_S8	up	PF05922:Peptidase inhibitor I9|PF00082:Subtilase family
Chr4	Cla018385	CHH	intron	0.138605	up	2.08784	1.62e-11	protein_coding	Lipase_GDSL	up	PF00657:GDSL-like Lipase/Acylhydrolase
Chr4	Cla018386	CHH	promoter	0.0840432	up	5.22009	0.0137001	protein_coding	-	up	-
Chr4	Cla018405	CHH	promoter	-0.284055	down	2.60763	0.02176	protein_coding	Auxin_inducible	up	PF02519:Auxin responsive protein
Chr4	Cla018445	CHH	intron	0.0474191	up	0.607064	0.0323937	protein_coding	Zim	up	PF09425:Divergent CCT motif|PF06200:tify domain
Chr4	Cla018476	CHH	promoter	0.067092	up	-1.80769	2.71e-10	protein_coding	-	down	PF13639:Ring finger domain
Chr4	Cla018645	CHH	promoter	-0.0826228	down	0.529311	0.0292551	protein_coding	RRM_1	up	PF12353:Eukaryotic translation initiation factor 3 subunit G|PF00076:RNA recognition motif. (a.k.a. RRM, RBD, or RNP domain)
Chr4	Cla018653	CHH	promoter	0.0716724	up	-0.69037	0.0408771	protein_coding	Aldo_ket_red	down	PF00248:Aldo/keto reductase family
Chr5	Cla021171	CHH	intron	-0.0939321	down	-0.971793	5.67e-05	protein_coding	Epimerase	down	PF01370:NAD dependent epimerase/dehydratase family
Chr5	Cla021295	CHH	exon	-0.0392898	down	-0.620291	0.0495397	protein_coding	FHA	down	PF00498:FHA domain
Chr5	Cla021393	CHH	exon	0.0287427	up	0.66242	0.00395509	protein_coding	RRM_1	up	PF00076:RNA recognition motif. (a.k.a. RRM, RBD, or RNP domain)
Chr5	Cla021544	CHH	promoter	0.0360163	up	-2.34777	0.0105701	protein_coding	ECH	down	PF00378:Enoyl-CoA hydratase/isomerase
Chr5	Cla021577	CHH	promoter	0.0215367	up	2.46189	1.45e-27	protein_coding	-	up	PF08392:FAE1/Type III polyketide synthase-like protein|PF08541:3-Oxoacyl-[acyl-carrier-protein (ACP)] synthase III C terminal
Chr5	Cla021577	CHH	TSS	0.0215367	up	2.46189	1.45e-27	protein_coding	-	up	PF08392:FAE1/Type III polyketide synthase-like protein|PF08541:3-Oxoacyl-[acyl-carrier-protein (ACP)] synthase III C terminal
Chr5	Cla021577	CHH	exon	0.0215367	up	2.46189	1.45e-27	protein_coding	-	up	PF08392:FAE1/Type III polyketide synthase-like protein|PF08541:3-Oxoacyl-[acyl-carrier-protein (ACP)] synthase III C terminal
Chr5	Cla021608	CHH	promoter	-0.113971	down	1.1087	0.0200565	protein_coding	-	up	PF00190:Cupin
Chr5	Cla021608	CHH	exon	0.033043	up	1.1087	0.0200565	protein_coding	-	up	PF00190:Cupin
Chr5	Cla021634	CHH	promoter	-0.043826	down	1.27096	0.00522392	protein_coding	-	up	PF01564:Spermine/spermidine synthase domain|PF17284:Spermidine synthase tetramerisation domain
Chr5	Cla021649	CHH	exon	-0.0225823	down	-3.3701	3.22e-13	protein_coding	-	down	PF11250:Fantastic Four meristem regulator
Chr5	Cla021663	CHH	exon	0.0218365	up	0.750409	0.00363329	protein_coding	-	up	PF13920:Zinc finger, C3HC4 type (RING finger)
Chr5	Cla021689	CHH	promoter	-0.0723121	down	-0.643887	0.0262137	protein_coding	-	down	-
Chr5	Cla021717	CHH	promoter	0.0966029	up	-1.33138	6.41e-07	protein_coding	Kelch_1	down	PF01344:Kelch motif|PF13418:Galactose oxidase, central domain
Chr5	Cla021799	CHH	exon	0.0699475	up	-1.08148	0.0463287	protein_coding	-	down	-
Chr5	Cla021801	CHH	promoter	-0.101013	down	-1.09077	0.0431681	protein_coding	Lipase_GDSL	down	PF00657:GDSL-like Lipase/Acylhydrolase
Chr5	Cla021835	CHH	promoter	0.097372	up	1.18108	4.71e-07	protein_coding	-	up	PF04607:Region found in RelA / SpoT proteins|PF13328:HD domain|PF13499:EF-hand domain pair
Chr5	Cla006241	CG	promoter	-0.121359	down	-1.08698	0.018537	protein_coding	-	down	PF06232:Embryo-specific protein 3, (ATS3)
Chr5	Cla006172	CHH	intron	-0.0884612	down	-0.799159	0.019309	protein_coding	-	down	PF03283:Pectinacetylesterase
Chr5	Cla006172	CHH	promoter	-0.0429625	down	-0.799159	0.019309	protein_coding	-	down	PF03283:Pectinacetylesterase
Chr5	Cla004285	CHH	promoter	0.110175	up	-3.07351	2.3e-14	protein_coding	-	down	-
Chr5	Cla013052	CHH	intron	0.0456809	up	1.54108	1.86e-05	protein_coding	WRKY	up	PF03106:WRKY DNA -binding domain
Chr5	Cla013135	CHH	promoter	-0.107545	down	2.37729	0.000296143	protein_coding	-	up	PF14541:Xylanase inhibitor C-terminal|PF14543:Xylanase inhibitor N-terminal
Chr5	Cla013155	CHG	intron	0.127361	up	-0.757771	0.0327415	protein_coding	-	down	-
Chr5	Cla003216	CHH	intron	0.069455	up	-3.52184	0.0242666	protein_coding	Ras	down	PF00071:Ras family
Chr5	Cla001039	CHH	promoter	0.147909	up	0.889382	0.000328361	protein_coding	-	up	PF03982:Diacylglycerol acyltransferase|PF12146:Serine aminopeptidase, S33
Chr5	Cla004174	CHH	promoter	-0.0892689	down	0.722289	0.0189699	protein_coding	Ras	up	PF00071:Ras family
Chr5	Cla001711	CHH	promoter	0.100995	up	-0.639692	0.00545114	protein_coding	WD40	down	PF00400:WD domain, G-beta repeat
Chr5	Cla007400	CHH	promoter	-0.0864113	down	1.84161	1.59e-09	protein_coding	AMP-binding	up	PF00501:AMP-binding enzyme
Chr5	Cla007404	CHH	promoter	0.0251633	up	-3.5988	2e-33	protein_coding	-	down	PF07731:Multicopper oxidase|PF00394:Multicopper oxidase|PF07732:Multicopper oxidase
Chr5	Cla007404	CHH	TSS	0.0251633	up	-3.5988	2e-33	protein_coding	-	down	PF07731:Multicopper oxidase|PF00394:Multicopper oxidase|PF07732:Multicopper oxidase
Chr5	Cla007404	CHH	exon	0.0251633	up	-3.5988	2e-33	protein_coding	-	down	PF07731:Multicopper oxidase|PF00394:Multicopper oxidase|PF07732:Multicopper oxidase
Chr5	Cla007450	CHH	promoter	-0.111623	down	-4.17343	1.63e-20	protein_coding	FAD_binding_4	down	PF01565:FAD binding domain|PF09265:Cytokinin dehydrogenase 1, FAD and cytokinin binding
Chr5	Cla021044	CHH	promoter	-0.0708073	down	1.4109	1.96e-07	protein_coding	-	up	PF05678:VQ motif
Chr5	Cla020995	CHH	promoter	-0.14656	down	-0.999831	0.000161074	protein_coding	-	down	-
Chr5	Cla020929	CHH	promoter	-0.0527306	down	0.962496	5.28e-05	protein_coding	Ribosomal_S24e	up	PF01282:Ribosomal protein S24e
Chr5	Cla020917	CHH	intron	0.055235	up	-1.57221	1.69e-06	protein_coding	tRNA_anti	down	PF01336:OB-fold nucleic acid binding domain
Chr5	Cla020811	CHH	promoter	0.0503108	up	-2.03205	0.00419301	protein_coding	-	down	PF07250:Glyoxal oxidase N-terminus|PF09118:Domain of unknown function (DUF1929)
Chr5	Cla020678	CHH	promoter	0.0376369	up	0.760239	0.00204581	protein_coding	-	up	PF05701:Weak chloroplast movement under blue light
Chr5	Cla020677	CHH	promoter	0.053439	up	-0.823579	0.0100748	protein_coding	-	down	PF08553:VID27 cytoplasmic protein
Chr5	Cla020655	CHH	promoter	0.0971326	up	-0.609413	0.0252478	protein_coding	NAM	down	PF02365:No apical meristem (NAM) protein
Chr5	Cla020655	CHH	promoter	-0.0841687	down	-0.609413	0.0252478	protein_coding	NAM	down	PF02365:No apical meristem (NAM) protein
Chr5	Cla020635	CHH	promoter	0.132684	up	1.30357	0.00694391	protein_coding	Asparaginase_2	up	PF01112:Asparaginase
Chr5	Cla020611	CHH	promoter	-0.0611968	down	-1.81367	0.000591272	protein_coding	-	down	-
Chr5	Cla020592	CHH	promoter	-0.131281	down	-0.697542	0.0107468	protein_coding	Peptidase_S10	down	PF00450:Serine carboxypeptidase
Chr5	Cla020532	CHH	promoter	-0.0922986	down	0.790656	0.000586351	protein_coding	-	up	PF00544:Pectate lyase
Chr5	Cla020529	CHH	promoter	0.099843	up	-1.69818	3.65e-11	protein_coding	-	down	PF00394:Multicopper oxidase|PF07732:Multicopper oxidase|PF07731:Multicopper oxidase
Chr5	Cla020510	CHH	promoter	-0.0710844	down	0.732516	0.0105358	protein_coding	OTU	up	PF02338:OTU-like cysteine protease
Chr5	Cla020453	CHH	promoter	-0.101794	down	-0.622855	0.0238258	protein_coding	-	down	PF14966:DNA repair REX1-B
Chr5	Cla020437	CHG	exon	0.0375116	up	1.11451	4.62e-07	protein_coding	NAD_binding_1	up	PF00175:Oxidoreductase NAD-binding domain
Chr5	Cla020315	CHH	promoter	-0.0984311	down	1.09456	0.0463727	protein_coding	p450	up	PF00067:Cytochrome P450
Chr5	Cla010224	CHH	promoter	0.0689663	up	4.88808	1.37e-06	protein_coding	-	up	PF03763:Remorin, C-terminal region
Chr5	Cla010147	CHH	promoter	0.0818465	up	1.25121	0.000951993	protein_coding	-	up	PF00854:POT family
Chr5	Cla010133	CHH	promoter	-0.102805	down	0.764982	0.00293517	protein_coding	E1-E2_ATPase	up	PF13246:Cation transport ATPase (P-type)|PF16209:Phospholipid-translocating ATPase N-terminal|PF16212:Phospholipid-translocating P-type ATPase C-terminal|PF00122:E1-E2 ATPase
Chr5	Cla010087	CHH	intron	-0.0576215	down	-1.60165	0.0223264	protein_coding	ADH_N	down	PF13602:Zinc-binding dehydrogenase|PF08240:Alcohol dehydrogenase GroES-like domain
Chr5	Cla010084	CHH	promoter	0.0439172	up	2.14621	0.000784541	protein_coding	Pkinase_Tyr	up	PF07714:Protein tyrosine kinase
Chr5	Cla010084	CHH	TSS	0.0439172	up	2.14621	0.000784541	protein_coding	Pkinase_Tyr	up	PF07714:Protein tyrosine kinase
Chr5	Cla010084	CHH	exon	0.0439172	up	2.14621	0.000784541	protein_coding	Pkinase_Tyr	up	PF07714:Protein tyrosine kinase
Chr5	Cla010032	CHH	promoter	0.0836895	up	1.00328	1.36e-06	protein_coding	-	up	PF10250:GDP-fucose protein O-fucosyltransferase
Chr5	Cla009967	CHH	intron	-0.0539359	down	0.910127	0.00177355	protein_coding	Aa_trans	up	PF01490:Transmembrane amino acid transporter protein
Chr5	Cla009938	CHH	promoter	-0.109427	down	5.41227	0.00778339	protein_coding	-	up	PF00854:POT family
Chr5	Cla009933	CHH	exon	0.0337081	up	1.88165	2e-07	protein_coding	FMN_red	up	PF03358:NADPH-dependent FMN reductase
Chr5	Cla009933	CHH	intron	0.0337081	up	1.88165	2e-07	protein_coding	FMN_red	up	PF03358:NADPH-dependent FMN reductase
Chr5	Cla009933	CHH	promoter	-0.113313	down	1.88165	2e-07	protein_coding	FMN_red	up	PF03358:NADPH-dependent FMN reductase
Chr5	Cla009933	CHH	promoter	-0.0840636	down	1.88165	2e-07	protein_coding	FMN_red	up	PF03358:NADPH-dependent FMN reductase
Chr6	Cla006962	CHH	promoter	0.0931523	up	-0.600483	0.0382487	protein_coding	Epimerase	down	PF01370:NAD dependent epimerase/dehydratase family
Chr6	Cla007006	CHH	promoter	-0.0961479	down	-0.934756	0.000328633	protein_coding	-	down	PF00166:Chaperonin 10 Kd subunit
Chr6	Cla006643	CHH	promoter	-0.108236	down	1.25974	0.000128385	protein_coding	BTB	up	PF07707:BTB And C-terminal Kelch|PF00651:BTB/POZ domain
Chr6	Cla006688	CHH	exon	0.0240575	up	2.39167	2.45e-07	protein_coding	p450	up	PF00067:Cytochrome P450
Chr6	Cla006692	CHH	exon	-0.0284355	down	-2.32925	5.25e-05	protein_coding	HLH	down	PF14215:bHLH-MYC and R2R3-MYB transcription factors N-terminal|PF00010:Helix-loop-helix DNA-binding domain
Chr6	Cla006727	CHH	intron	-0.102094	down	-4.35704	8.28e-05	protein_coding	RPE65	down	PF03055:Retinal pigment epithelial membrane protein
Chr6	Cla001217	CHH	intron	0.112141	up	2.43685	0.00493391	protein_coding	-	up	PF05686:Glycosyl transferase family 90
Chr6	Cla009280	CHH	promoter	0.127071	up	1.66278	0.00379881	protein_coding	PP2C	up	PF00481:Protein phosphatase 2C
Chr6	Cla009383	CHH	intron	-0.12179	down	2.69682	2.79e-12	protein_coding	-	up	PF00483:Nucleotidyl transferase
Chr6	Cla009392	CHH	promoter	0.136471	up	1.38539	0.00617986	protein_coding	-	up	PF12819:Carbohydrate-binding protein of the ER
Chr6	Cla009407	CHH	intron	-0.140971	down	1.22795	0.000119388	protein_coding	-	up	PF02727:Copper amine oxidase, N2 domain|PF02728:Copper amine oxidase, N3 domain|PF01179:Copper amine oxidase, enzyme domain
Chr6	Cla007543	CHH	intron	-0.116543	down	-0.645486	0.0056684	protein_coding	-	down	PF00326:Prolyl oligopeptidase family
Chr6	Cla007543	CHH	promoter	-0.104153	down	-0.645486	0.0056684	protein_coding	-	down	PF00326:Prolyl oligopeptidase family
Chr6	Cla007605	CG	exon	-0.0832529	down	0.711211	0.00557464	protein_coding	-	up	PF00854:POT family
Chr6	Cla010657	CHH	promoter	-0.127816	down	-2.49638	8.61e-13	protein_coding	-	down	PF16953:Protein-only RNase P|PF17177:Pentacotripeptide-repeat region of PRORP
Chr6	Cla004116	CHH	promoter	0.0330122	up	-0.915913	0.00291596	protein_coding	Sugar_tr	down	PF00083:Sugar (and other) transporter
Chr6	Cla000857	CHG	exon	0.0551745	up	-0.935617	0.0010771	protein_coding	-	down	-
Chr6	Cla000783	CHH	promoter	0.0900548	up	0.799322	0.0320114	protein_coding	-	up	PF13921:Myb-like DNA-binding domain|PF11831:pre-mRNA splicing factor component
Chr6	Cla012239	CHH	promoter	-0.0521178	down	-1.50952	1.78e-07	protein_coding	SPX	down	PF03105:SPX domain
Chr6	Cla012233	CHH	promoter	0.0752431	up	1.56486	0.000251998	protein_coding	-	up	-
Chr6	Cla018685	CHH	promoter	-0.0700838	down	1.57444	3.54e-14	protein_coding	-	up	-
Chr6	Cla018698	CHH	promoter	-0.06033	down	1.46108	0.000487909	protein_coding	-	up	-
Chr6	Cla018734	CHH	promoter	0.148778	up	-1.94129	1.07e-05	protein_coding	-	down	-
Chr6	Cla018788	CHH	promoter	-0.109875	down	-0.624833	0.0404224	protein_coding	-	down	PF13088:BNR repeat-like domain
Chr6	Cla018790	CHH	promoter	0.0872191	up	-0.747925	0.00155296	protein_coding	-	down	PF00609:Diacylglycerol kinase accessory domain|PF00781:Diacylglycerol kinase catalytic domain
Chr6	Cla018801	CHH	promoter	-0.10043	down	-3.92401	1.36e-24	protein_coding	SCP	down	PF00188:Cysteine-rich secretory protein family
Chr6	Cla018825	CHH	promoter	0.114579	up	-3.77525	0.00248397	protein_coding	AAA	down	PF00004:ATPase family associated with various cellular activities (AAA)|PF14363:Domain associated at C-terminal with AAA
Chr6	Cla018872	CHH	promoter	-0.158711	down	-0.846046	0.00956311	protein_coding	-	down	-
Chr6	Cla018902	CHH	intron	0.170665	up	-1.91681	0.0155605	protein_coding	-	down	PF13249:Squalene-hopene cyclase N-terminal domain|PF13243:Squalene-hopene cyclase C-terminal domain
Chr6	Cla018902	CHH	intron	0.130085	up	-1.91681	0.0155605	protein_coding	-	down	PF13249:Squalene-hopene cyclase N-terminal domain|PF13243:Squalene-hopene cyclase C-terminal domain
Chr6	Cla018902	CHH	intron	0.150431	up	-1.91681	0.0155605	protein_coding	-	down	PF13249:Squalene-hopene cyclase N-terminal domain|PF13243:Squalene-hopene cyclase C-terminal domain
Chr6	Cla018930	CHH	promoter	-0.131129	down	1.52431	3.44e-08	protein_coding	-	up	-
Chr6	Cla018932	CHH	promoter	-0.0911479	down	0.70619	0.0284904	protein_coding	Pkinase	up	PF00069:Protein kinase domain
Chr6	Cla018999	CHH	promoter	0.103691	up	0.751647	0.0149876	protein_coding	-	up	PF01008:Initiation factor 2 subunit family
Chr6	Cla019092	CHH	intron	0.100782	up	-2.03041	2.27e-09	protein_coding	Pkinase_Tyr	down	PF07714:Protein tyrosine kinase|PF12819:Carbohydrate-binding protein of the ER
Chr6	Cla019157	CHH	promoter	0.0919495	up	-1.81219	3.11e-13	protein_coding	Response_reg	down	PF00072:Response regulator receiver domain
Chr6	Cla019244	CHH	exon	0.107629	up	3.02339	0.00719303	protein_coding	-	up	-
Chr6	Cla019244	CHH	intron	0.107629	up	3.02339	0.00719303	protein_coding	-	up	-
Chr6	Cla019259	CHH	promoter	0.0772386	up	-1.02671	0.00509891	protein_coding	-	down	PF08387:FBD
Chr7	Cla002690	CHH	promoter	-0.102789	down	-1.82805	0.0162004	protein_coding	-	down	PF04172:LrgB-like family
Chr7	Cla002693	CHH	promoter	-0.0923123	down	-4.18509	5.24e-10	protein_coding	-	down	PF04720:PDDEXK-like family of unknown function
Chr7	Cla002746	CHH	promoter	0.138213	up	-0.77241	0.00192203	protein_coding	SHMT	down	PF00464:Serine hydroxymethyltransferase
Chr7	Cla002251	CHH	promoter	-0.132373	down	-2.05425	1.93e-12	protein_coding	-	down	PF00141:Peroxidase
Chr7	Cla002258	CHH	promoter	-0.0869142	down	-1.791	2.94e-05	protein_coding	-	down	PF04852:Protein of unknown function (DUF640)
Chr7	Cla002265	CHH	promoter	-0.0715597	down	-1.62183	4.54e-10	protein_coding	-	down	PF04720:PDDEXK-like family of unknown function
Chr7	Cla002285	CHH	promoter	0.0427865	up	-0.850488	0.0204624	protein_coding	-	down	-
Chr7	Cla005939	CHH	promoter	0.0785363	up	0.702865	0.00515162	protein_coding	-	up	-
Chr7	Cla005953	CHH	promoter	0.114131	up	-0.919692	0.00139571	protein_coding	-	down	-
Chr7	Cla005959	CHH	intron	-0.0521782	down	1.30501	0.000604965	protein_coding	-	up	PF02115:RHO protein GDP dissociation inhibitor
Chr7	Cla005966	CHH	promoter	0.198666	up	0.687668	0.00278657	protein_coding	Pkinase	up	PF00069:Protein kinase domain
Chr7	Cla006030	CHH	intron	0.122414	up	0.776659	0.0296472	protein_coding	-	up	PF13499:EF-hand domain pair
Chr7	Cla006055	CHH	promoter	-0.0852612	down	-0.775365	0.0439179	protein_coding	-	down	PF01926:50S ribosome-binding GTPase
Chr7	Cla006055	CHH	promoter	0.101641	up	-0.775365	0.0439179	protein_coding	-	down	PF01926:50S ribosome-binding GTPase
Chr7	Cla003995	CHH	intron	-0.0820982	down	-1.51175	0.0296905	protein_coding	AAA	down	PF00004:ATPase family associated with various cellular activities (AAA)
Chr7	Cla004001	CHH	promoter	-0.13094	down	-2.538	1.29e-08	protein_coding	-	down	-
Chr7	Cla004343	CHH	promoter	-0.0762787	down	1.49862	2.1e-07	protein_coding	-	up	-
Chr7	Cla004345	CHH	promoter	-0.10756	down	1.22985	0.0166536	protein_coding	-	up	PF07011:Protein of unknown function (DUF1313)
Chr7	Cla004356	CHH	promoter	0.18374	up	0.926126	6.72e-06	protein_coding	-	up	PF00487:Fatty acid desaturase|PF11960:Domain of unknown function (DUF3474)
Chr7	Cla007234	CHH	promoter	0.173829	up	-1.05091	0.01332	protein_coding	-	down	PF03141:Putative S-adenosyl-L-methionine-dependent methyltransferase
Chr7	Cla007241	CHH	promoter	0.131163	up	0.849807	0.000366776	protein_coding	-	up	PF13507:CobB/CobQ-like glutamine amidotransferase domain|PF02769:AIR synthase related protein, C-terminal domain
Chr7	Cla007265	CHH	promoter	0.0363084	up	1.92656	0.000185095	protein_coding	Aa_trans	up	PF01490:Transmembrane amino acid transporter protein
Chr7	Cla007270	CHH	promoter	0.132598	up	0.839379	0.0237795	protein_coding	-	up	-
Chr7	Cla011801	CHH	promoter	-0.055606	down	-1.14501	0.00229681	protein_coding	-	down	PF01758:Sodium Bile acid symporter family
Chr7	Cla011798	CHH	promoter	0.114132	up	0.737533	0.00677944	protein_coding	-	up	PF07946:Protein of unknown function (DUF1682)
Chr7	Cla001954	CHH	intron	-0.168857	down	1.09222	7.24e-05	protein_coding	-	up	PF00191:Annexin
Chr7	Cla007500	CHH	promoter	0.129807	up	-1.62274	4.32e-09	protein_coding	-	down	PF00722:Glycosyl hydrolases family 16|PF06955:Xyloglucan endo-transglycosylase (XET) C-terminus
Chr7	Cla001938	CHH	promoter	0.124276	up	-0.566891	0.0356476	protein_coding	-	down	PF16123:Hydroxyacylglutathione hydrolase C-terminus
Chr7	Cla014583	CHH	promoter	-0.0883463	down	1.96725	2.53e-05	protein_coding	ZF-HD_dimer	up	PF04770:ZF-HD protein dimerisation region
Chr7	Cla002435	CHH	promoter	-0.146211	down	-1.51724	0.000275665	protein_coding	-	down	-
Chr7	Cla012630	CHH	promoter	-0.101497	down	1.15922	0.000327652	protein_coding	Peptidase_M20	up	PF07687:Peptidase dimerisation domain|PF01546:Peptidase family M20/M25/M40
Chr7	Cla012793	CHH	intron	0.106838	up	0.881732	0.00353943	protein_coding	-	up	-
Chr7	Cla012826	CHH	promoter	0.120461	up	-2.99971	1.02e-06	protein_coding	-	down	PF03552:Cellulose synthase
Chr7	Cla005396	CHH	promoter	0.096389	up	0.647781	0.0420426	protein_coding	-	up	PF13906:C-terminus of AA_permease|PF13520:Amino acid permease
Chr7	Cla005408	CHH	promoter	-0.121214	down	1.48403	1.56e-11	protein_coding	GST_N	up	PF02798:Glutathione S-transferase, N-terminal domain|PF00043:Glutathione S-transferase, C-terminal domain
Chr7	Cla005456	CHG	intron	-0.0712033	down	0.820357	0.00717221	protein_coding	-	up	-
Chr7	Cla005456	CHG	exon	-0.0712033	down	0.820357	0.00717221	protein_coding	-	up	-
Chr7	Cla010896	CHG	promoter	0.103344	up	0.799515	0.00656234	protein_coding	IQ	up	PF00612:IQ calmodulin-binding motif|PF13178:Protein of unknown function (DUF4005)
Chr7	Cla010896	CHH	promoter	0.0356491	up	0.799515	0.00656234	protein_coding	IQ	up	PF00612:IQ calmodulin-binding motif|PF13178:Protein of unknown function (DUF4005)
Chr7	Cla010896	CHG	promoter	0.103219	up	0.799515	0.00656234	protein_coding	IQ	up	PF00612:IQ calmodulin-binding motif|PF13178:Protein of unknown function (DUF4005)
Chr7	Cla010940	CHH	promoter	-0.138547	down	-4.47809	0.000676418	protein_coding	-	down	PF04116:Fatty acid hydroxylase superfamily
Chr8	Cla012397	CHH	promoter	-0.0997923	down	3.27555	0.0138591	protein_coding	Abhydrolase_3	up	PF07859:alpha/beta hydrolase fold
Chr8	Cla003863	CHH	promoter	0.0861798	up	-1.23911	8.42e-08	protein_coding	CRAL_TRIO_N	down	PF03765:CRAL/TRIO, N-terminal domain|PF00650:CRAL/TRIO domain
Chr8	Cla007205	CHH	promoter	-0.088844	down	-0.563274	0.0327415	protein_coding	Histone	down	PF00125:Core histone H2A/H2B/H3/H4
Chr8	Cla013912	CHH	promoter	0.0909698	up	1.10764	3.89e-05	protein_coding	Aa_trans	up	PF01490:Transmembrane amino acid transporter protein
Chr8	Cla013901	CHH	promoter	0.129018	up	-1.14403	0.03442	protein_coding	efhand	down	PF13499:EF-hand domain pair|PF00036:EF hand
Chr8	Cla013870	CHH	promoter	0.0699498	up	-1.20754	0.0127975	protein_coding	-	down	PF00085:Thioredoxin
Chr8	Cla013870	CHH	promoter	-0.10724	down	-1.20754	0.0127975	protein_coding	-	down	PF00085:Thioredoxin
Chr8	Cla013847	CHH	promoter	-0.0810184	down	-5.20124	0.017151	protein_coding	-	down	-
Chr8	Cla013761	CHH	promoter	0.118245	up	1.02561	0.0106804	protein_coding	-	up	PF00221:Aromatic amino acid lyase
Chr8	Cla013741	CHH	promoter	-0.0982159	down	1.20075	1.48e-07	protein_coding	AAA	up	PF00004:ATPase family associated with various cellular activities (AAA)
Chr8	Cla013721	CHH	promoter	-0.14894	down	-2.9284	4.03e-40	protein_coding	-	down	-
Chr8	Cla013680	CG	promoter	-0.209697	down	-1.49727	2.71e-05	protein_coding	-	down	PF02485:Core-2/I-Branching enzyme
Chr8	Cla013671	CHH	promoter	0.129761	up	1.10602	4.11e-05	protein_coding	E1-E2_ATPase	up	PF13246:Cation transport ATPase (P-type)|PF16212:Phospholipid-translocating P-type ATPase C-terminal|PF16209:Phospholipid-translocating ATPase N-terminal|PF00122:E1-E2 ATPase
Chr8	Cla021929	CHH	intron	-0.0665527	down	0.539166	0.0308182	protein_coding	Pkinase	up	PF00069:Protein kinase domain
Chr8	Cla021931	CHH	promoter	-0.100101	down	0.751175	0.00967596	protein_coding	Pkinase_Tyr	up	PF07714:Protein tyrosine kinase
Chr8	Cla021931	CHH	promoter	0.0401315	up	0.751175	0.00967596	protein_coding	Pkinase_Tyr	up	PF07714:Protein tyrosine kinase
Chr8	Cla021948	CHH	intron	-0.0945693	down	6.48487	0.000153722	protein_coding	-	up	PF03641:Possible lysine decarboxylase
Chr8	Cla022052	CHH	intron	0.107324	up	-0.804477	0.0226307	protein_coding	Peptidase_S8	down	PF00082:Subtilase family|PF05922:Peptidase inhibitor I9|PF02225:PA domain
Chr8	Cla022107	CHH	promoter	-0.117919	down	-4.87823	3.49e-11	protein_coding	-	down	PF07847:PCO_ADO
Chr8	Cla022179	CHH	promoter	-0.028171	down	2.03527	1.95e-07	protein_coding	-	up	-
Chr8	Cla022319	CHH	promoter	0.0383119	up	1.67782	1.09e-09	protein_coding	-	up	PF03151:Triose-phosphate Transporter family
Chr8	Cla022410	CHH	promoter	0.124616	up	-0.986054	0.000196823	protein_coding	Ras	down	PF00071:Ras family
Chr8	Cla022499	CHH	promoter	0.134306	up	-0.623609	0.0178032	protein_coding	-	down	PF00342:Phosphoglucose isomerase
Chr9	Cla015610	CHH	promoter	0.101196	up	0.903524	0.0465815	protein_coding	Pkinase_Tyr	up	PF07714:Protein tyrosine kinase|PF13855:Leucine rich repeat|PF12819:Carbohydrate-binding protein of the ER
Chr9	Cla015585	CHH	promoter	0.121993	up	-0.730787	0.00166678	protein_coding	-	down	-
Chr9	Cla015574	CHH	promoter	-0.0790371	down	1.14396	8.45e-05	protein_coding	-	up	PF00251:Glycosyl hydrolases family 32 N-terminal domain|PF08244:Glycosyl hydrolases family 32 C terminal
Chr9	Cla015552	CHH	promoter	0.154802	up	-2.10371	0.0275935	protein_coding	-	down	PF13460:NAD(P)H-binding
Chr9	Cla015377	CHG	TES	0.0709738	up	-1.49631	2.67e-10	protein_coding	Glyoxalase	down	PF00903:Glyoxalase/Bleomycin resistance protein/Dioxygenase superfamily
Chr9	Cla015377	CHG	exon	0.0709738	up	-1.49631	2.67e-10	protein_coding	Glyoxalase	down	PF00903:Glyoxalase/Bleomycin resistance protein/Dioxygenase superfamily
Chr9	Cla015320	CHH	promoter	0.127751	up	-0.833223	0.00499574	protein_coding	Pkinase	down	PF00069:Protein kinase domain
Chr9	Cla015221	CHH	intron	-0.0760106	down	1.068	0.0360226	protein_coding	p450	up	PF00067:Cytochrome P450
Chr9	Cla015181	CHH	promoter	-0.109327	down	-4.10824	0.000467591	protein_coding	-	down	PF00141:Peroxidase
Chr9	Cla015137	CHH	intron	0.0582489	up	-0.865242	0.00256986	protein_coding	MCM	down	PF00493:MCM2/3/5 family|PF14551:MCM N-terminal domain|PF17207:MCM OB domain
Chr9	Cla015093	CHH	promoter	0.0975688	up	-0.657007	0.00908744	protein_coding	WGR	down	PF02037:SAP domain|PF00644:Poly(ADP-ribose) polymerase catalytic domain|PF02877:Poly(ADP-ribose) polymerase, regulatory domain|PF05406:WGR domain
Chr9	Cla014735	CHH	exon	-0.043026	down	2.70853	1.88e-26	protein_coding	-	up	-
Chr9	Cla014751	CHH	promoter	0.089525	up	1.64794	3.18e-12	protein_coding	-	up	PF02567:Phenazine biosynthesis-like protein
Chr9	Cla014819	CHH	promoter	0.108125	up	-1.97015	3.92e-08	protein_coding	-	down	-
Chr9	Cla014912	CHH	promoter	0.101683	up	-1.00143	0.0199253	protein_coding	-	down	-
Chr9	Cla015017	CHG	exon	0.0527842	up	0.845122	0.000117382	protein_coding	GTP_EFTU	up	PF00009:Elongation factor Tu GTP binding domain|PF03144:Elongation factor Tu domain 2|PF11987:Translation-initiation factor 2
Chr9	Cla015024	CHH	promoter	-0.107266	down	-1.14359	5.45e-05	protein_coding	-	down	PF01789:PsbP
Chr9	Cla015033	CHH	promoter	0.0711604	up	-0.940312	0.0401457	protein_coding	Peptidase_S10	down	PF00450:Serine carboxypeptidase
Chr9	Cla016402	CHH	promoter	0.131527	up	2.13002	3.41e-10	protein_coding	-	up	-
Chr9	Cla016228	CHH	promoter	0.146491	up	-0.685247	0.0460335	protein_coding	-	down	PF05770:Inositol 1, 3, 4-trisphosphate 5/6-kinase
Chr9	Cla002819	CHH	promoter	-0.0853188	down	0.656851	0.00124126	protein_coding	-	up	PF00327:Ribosomal protein L30p/L7e|PF08079:Ribosomal L30 N-terminal domain
Chr9	Cla009437	CHG	exon	0.0402721	up	1.03426	0.0291496	protein_coding	-	up	PF16987:KIX domain
Chr9	Cla006375	CHH	promoter	-0.101223	down	2.51088	2.01e-06	protein_coding	UDPGT	up	PF00201:UDP-glucoronosyl and UDP-glucosyl transferase
Chr9	Cla010284	CHH	promoter	-0.115648	down	-3.20043	1.86e-17	protein_coding	-	down	-
Chr9	Cla010296	CHH	intron	-0.108707	down	3.89073	5.44e-14	protein_coding	-	up	PF05055:Protein of unknown function (DUF677)
Chr9	Cla010314	CHH	promoter	-0.132629	down	-2.51469	6.48e-14	protein_coding	SPX	down	PF03105:SPX domain
Chr9	Cla010376	CHH	promoter	-0.147964	down	-0.570991	0.0380609	protein_coding	-	down	PF13883:Pyridoxamine 5'-phosphate oxidase
Chr9	Cla010386	CHH	promoter	-0.0377793	down	0.535129	0.0494057	protein_coding	-	up	PF13563:2'-5' RNA ligase superfamily
Chr9	Cla004639	CHH	promoter	0.107688	up	-0.98796	0.00198446	protein_coding	NAD_Gly3P_dh_N	down	PF07479:NAD-dependent glycerol-3-phosphate dehydrogenase C-terminus|PF01210:NAD-dependent glycerol-3-phosphate dehydrogenase N-terminus
Chr9	Cla004642	CHH	promoter	0.036426	up	1.79281	7.49e-05	protein_coding	-	up	PF00544:Pectate lyase
Chr9	Cla005508	CHH	promoter	-0.118819	down	1.04456	1.16e-05	protein_coding	NAM	up	PF02365:No apical meristem (NAM) protein
